# Supplementary material for: Development and Integration of Patient-Reported Measures into E-Health System: Pilot Feasibility Study
Source: MDPI journal article supplement (doi:10.3390/healthcare11162290), 2023-08-14
Supplement: s1 [file s1]

**Supplement 3.** Item-item and item-total correlations of patient-reported experience measure questionnaire responses.

|       |     | Spearman's Correlation<br>Coefficient ( $\rho$ ) | $p$    |
|-------|-----|--------------------------------------------------|--------|
| Items |     |                                                  |        |
| Q1    | Q2  | 0.495                                            | <0.001 |
| Q1    | Q3  | 0.368                                            | <0.001 |
| Q1    | Q4  | 0.220                                            | 0.003  |
| Q1    | Q5  | 0.120                                            | 0.103  |
| Q1    | Q6  | 0.226                                            | <0.001 |
| Q1    | Q7  | 0.319                                            | <0.001 |
| Q1    | Q8  | 0.224                                            | <0.001 |
| Q1    | Q9  | 0.100                                            | 0.112  |
| Q1    | Q10 | 0.317                                            | <0.001 |
| Q1    | Q11 | 0.241                                            | <0.001 |
| Q1    | Q12 | 0.083                                            | 0.463  |
| Q2    | Q3  | 0.318                                            | <0.001 |
| Q2    | Q4  | 0.436                                            | <0.001 |
| Q2    | Q5  | 0.381                                            | <0.001 |
| Q2    | Q6  | 0.282                                            | <0.001 |
| Q2    | Q7  | 0.379                                            | <0.001 |
| Q2    | Q8  | 0.318                                            | <0.001 |
| Q2    | Q9  | 0.120                                            | 0.056  |
| Q2    | Q10 | 0.437                                            | <0.001 |
| Q2    | Q11 | 0.370                                            | <0.001 |
| Q2    | Q12 | 0.208                                            | 0.062  |
| Q3    | Q4  | 0.299                                            | <0.001 |
| Q3    | Q5  | 0.332                                            | <0.001 |
| Q3    | Q6  | 0.399                                            | <0.001 |
| Q3    | Q7  | 0.382                                            | <0.001 |
| Q3    | Q8  | 0.325                                            | <0.001 |
| Q3    | Q9  | 0.220                                            | 0.001  |
| Q3    | Q10 | 0.390                                            | <0.001 |
| Q3    | Q11 | 0.367                                            | <0.001 |
| Q3    | Q12 | 0.355                                            | 0.002  |
| Q4    | Q5  | 0.688                                            | <0.001 |
| Q4    | Q6  | 0.257                                            | <0.001 |
| Q4    | Q7  | 0.453                                            | <0.001 |
| Q4    | Q8  | 0.572                                            | <0.001 |
| Q4    | Q9  | 0.290                                            | <0.001 |
| Q4    | Q10 | 0.427                                            | <0.001 |
| Q4    | Q11 | 0.469                                            | <0.001 |
| Q4    | Q12 | 0.558                                            | <0.001 |
| Q5    | Q6  | 0.314                                            | <0.001 |
| Q5    | Q7  | 0.492                                            | <0.001 |
| Q5    | Q8  | 0.496                                            | <0.001 |
| Q5    | Q9  | 0.259                                            | <0.001 |
| Q5    | Q10 | 0.311                                            | <0.001 |

|     |     |       |        |
|-----|-----|-------|--------|
| Q5  | Q11 | 0.414 | <0.001 |
| Q5  | Q12 | 0.291 | 0.024  |
| Q6  | Q7  | 0.457 | <0.001 |
| Q6  | Q8  | 0.426 | <0.001 |
| Q6  | Q9  | 0.190 | 0.002  |
| Q6  | Q10 | 0.161 | 0.010  |
| Q6  | Q11 | 0.360 | <0.001 |
| Q6  | Q12 | 0.197 | 0.079  |
| Q7  | Q8  | 0.550 | <0.001 |
| Q7  | Q9  | 0.255 | <0.001 |
| Q7  | Q10 | 0.394 | <0.001 |
| Q7  | Q11 | 0.603 | <0.001 |
| Q7  | Q12 | 0.375 | <0.001 |
| Q8  | Q9  | 0.315 | <0.001 |
| Q8  | Q10 | 0.374 | <0.001 |
| Q8  | Q11 | 0.522 | <0.001 |
| Q8  | Q12 | 0.444 | <0.001 |
| Q9  | Q10 | 0.435 | <0.001 |
| Q9  | Q11 | 0.378 | <0.001 |
| Q9  | Q12 | 0.468 | <0.001 |
| Q10 | Q11 | 0.493 | <0.001 |
| Q10 | Q12 | 0.345 | 0.002  |
| Q11 | Q12 | 0.761 | <0.001 |

**Items with a total score (PREM)**

|     |                  |       |        |
|-----|------------------|-------|--------|
| Q1  | PREM total score | 0.515 | <0.001 |
| Q2  | PREM total score | 0.620 | <0.001 |
| Q3  | PREM total score | 0.590 | <0.001 |
| Q4  | PREM total score | 0.639 | <0.001 |
| Q5  | PREM total score | 0.562 | <0.001 |
| Q6  | PREM total score | 0.533 | <0.001 |
| Q7  | PREM total score | 0.665 | <0.001 |
| Q8  | PREM total score | 0.664 | <0.001 |
| Q9  | PREM total score | 0.582 | <0.001 |
| Q10 | PREM total score | 0.729 | <0.001 |
| Q11 | PREM total score | 0.735 | <0.001 |
| Q12 | PREM total score | 0.749 | <0.001 |

---

Q1 to Q12—Question 1 to Question 12 of the original Patient-Reported Experience Measure (PREM). Full questionnaire consisting of 12 questions is provided as Supplement 1.
