# Supplementary material for: Development and Integration of Patient-Reported Measures into E-Health System: Pilot Feasibility Study
Source: MDPI journal article supplement (doi:10.3390/healthcare11162290), 2023-08-14
Supplement: s1 [file s1]

**Supplement 2.** Item-item and item-total correlations of patient-reported outcomes measure questionnaire responses.

|                                     |                    | <b>Spearman's Correlation<br/>Coefficient (<math>\rho</math>)</b> | <b><i>p</i></b> |
|-------------------------------------|--------------------|-------------------------------------------------------------------|-----------------|
| <b>Dimensions</b>                   |                    |                                                                   |                 |
| Mobility                            | Self-care          | 0.748                                                             | <0.001          |
| Mobility                            | Usual activities   | 0.702                                                             | <0.001          |
| Mobility                            | Pain/discomfort    | 0.682                                                             | <0.001          |
| Mobility                            | Anxiety/depression | 0.484                                                             | <0.001          |
| Mobility                            | VAS                | −0.620                                                            | <0.001          |
| Self-care                           | Usual activities   | 0.683                                                             | <0.001          |
| Self-care                           | Pain/discomfort    | 0.534                                                             | <0.001          |
| Self-care                           | Anxiety/depression | 0.403                                                             | <0.001          |
| Self-care                           | VAS                | −0.522                                                            | <0.001          |
| Usual activities                    | Pain/discomfort    | 0.630                                                             | <0.001          |
| Usual activities                    | Anxiety/depression | 0.371                                                             | <0.001          |
| Usual activities                    | VAS                | −0.616                                                            | <0.001          |
| Pain/discomfort                     | Anxiety/depression | 0.481                                                             | <0.001          |
| Pain/discomfort                     | VAS                | −0.585                                                            | <0.001          |
| Anxiety/ depression                 | VAS                | −0.482                                                            | <0.001          |
| <b>Dimension with a total score</b> |                    |                                                                   |                 |
| Mobility                            | EQ-5D total score  | −0.870                                                            | <0.001          |
| Self-care                           | EQ-5D total score  | −0.743                                                            | <0.001          |
| Usual activities                    | EQ-5D total score  | −0.836                                                            | <0.001          |
| Pain/discomfort                     | EQ-5D total score  | −0.863                                                            | <0.001          |
| Anxiety/ depression                 | EQ-5D total score  | −0.592                                                            | <0.001          |
| VAS                                 | EQ-5D total score  | 0.675                                                             | <0.001          |

VAS—visual analog scale
